# Supplementary material for: Fungal loop transfer of N depends on biocrust constituents and N form
Source: Copernicus journal article supplement (doi:10.5194/bg-2017-433), 2017-11-20

**Supplemental Figure 1** The field design of circular plots (radius = 1.0 m) receiving minor, localized rainfall events. An example of five biocrust (BC) and *Achnatherum hymenoides* (AH) samples occurring randomly along eight axes (e.g., N, NE, E, SE, S, SW, W, and NW) radiating from the center of each plot (A). An isotopically labeled (0.30 mg  $^{15}\text{N}$ ) rainfall event (2.5 mm) was sprayed onto a central circle (radius = 5 cm). Rainfall events occurred on the surfaces of cyanobacteria-dominated (B) and moss-dominated biocrust.

A. circular plots

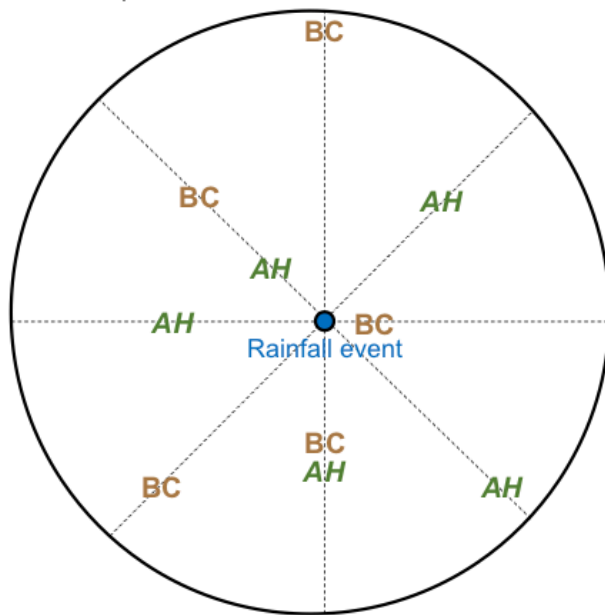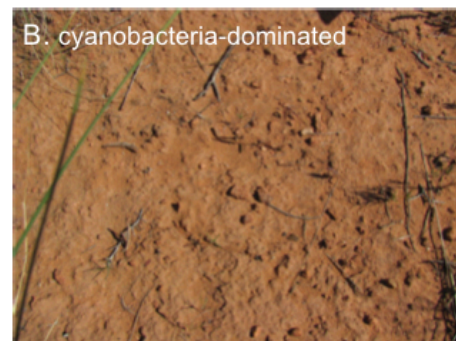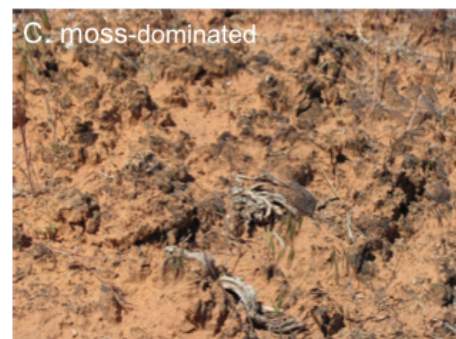

Supplement: Supplementary file [file bg-2017-433-AC1-supplement.pdf]
